# Supplementary material for: BMP4 depletion by miR-200 inhibits tumorigenesis and metastasis of lung adenocarcinoma cells
Source: Springer Nature journal article supplement (doi:10.1186/s12943-015-0441-y), 2015-09-22
Supplement: MOESM1 [file 9763224]

## **Supplementary Figure legends**

### **Figure S1. Negative correlation between BMP4 and miR-200 family members in murine lung adenocarcinoma cells.**

Quantitative RT-PCR (qRT-PCR) of *Bmp4* and miR-200 family members (miR-200a, 200b, 141, and 429) in 13 murine lung adenocarcinoma cells. r and p, one-tailed Spearman's rank correlation test.

### **Figure S2. Negative correlation between BMP4 and miR-200 family members in human lung adenocarcinomas.**

mRNA and miRNA microarray data of human lung adenocarcinomas (n=32) were obtained from NCBI Gene Expression Omnibus database (GSE63459 and GSE63805, respectively). r and p, one-tailed Spearman's rank correlation test.

### **Figure S3. Negative correlation between BMP4 and miR-200 family members in human breast invasive carcinomas.**

mRNA and miRNA expression data of human breast invasive carcinomas (TCGA, Nature 2012, n=285) were obtained from cBioPortal (<http://www.cbioportal.org/>). r and p, one-tailed Spearman's rank correlation test.

### **Figure S4. BMP4 is down-regulated in miR-200-overexpressing cells.**

(A) qRT-PCR of miR-200 family members (200a, 200b, and 200c) in 344SQ transfected with miR-200b/200a/429. The expression levels were normalized to those of 344SQ\_vec (=1.0). Mean±SD, n=3; p, two-tailed Student's *t*-test. (B) qRT-PCR of *Bmp4* and *Zeb1* in 531LN2

transfected with miR-200b/200a/429 (miR-200). The expression levels were normalized to those of 531LN2\_vec (=1.0). Mean+SD, n=3; p, two-tailed Student's *t*-test.

**Figure S5. BMP4 knockdown suppresses cancer cell growth and migration.** (A) qRT-PCR of *BMP4* in H157 transfected with *BMP4* shRNAs (KD #3 and #5) or nontargeting control (NTC) vector. The expression levels were normalized to that of NTC (=1.0). Mean+SD, n=3; p, two-tailed Student's *t*-test. (B) MTT assay of H157-*BMP4*-KD and NTC cells over 4 days. Mean±SD, n=4; p, two-tailed Student's *t*-test. (C) Soft agar assays of H157-*BMP4*-KD and NTC cells over 2 weeks. Colonies (> 200 µm in diameter) of three randomly selected fields were counted using ImageJ. Mean+SD, n=3; p, two-tailed Student's *t*-test. (D) Migrated cells in Boyden chambers were photographed and counted. Mitomycin C (1 µg/mL) was added to the culture media to block cell proliferation. Mean+SD, n=3; p, two-tailed Student's *t*-test.

# Murine lung adenocarcinoma cells (n=13)

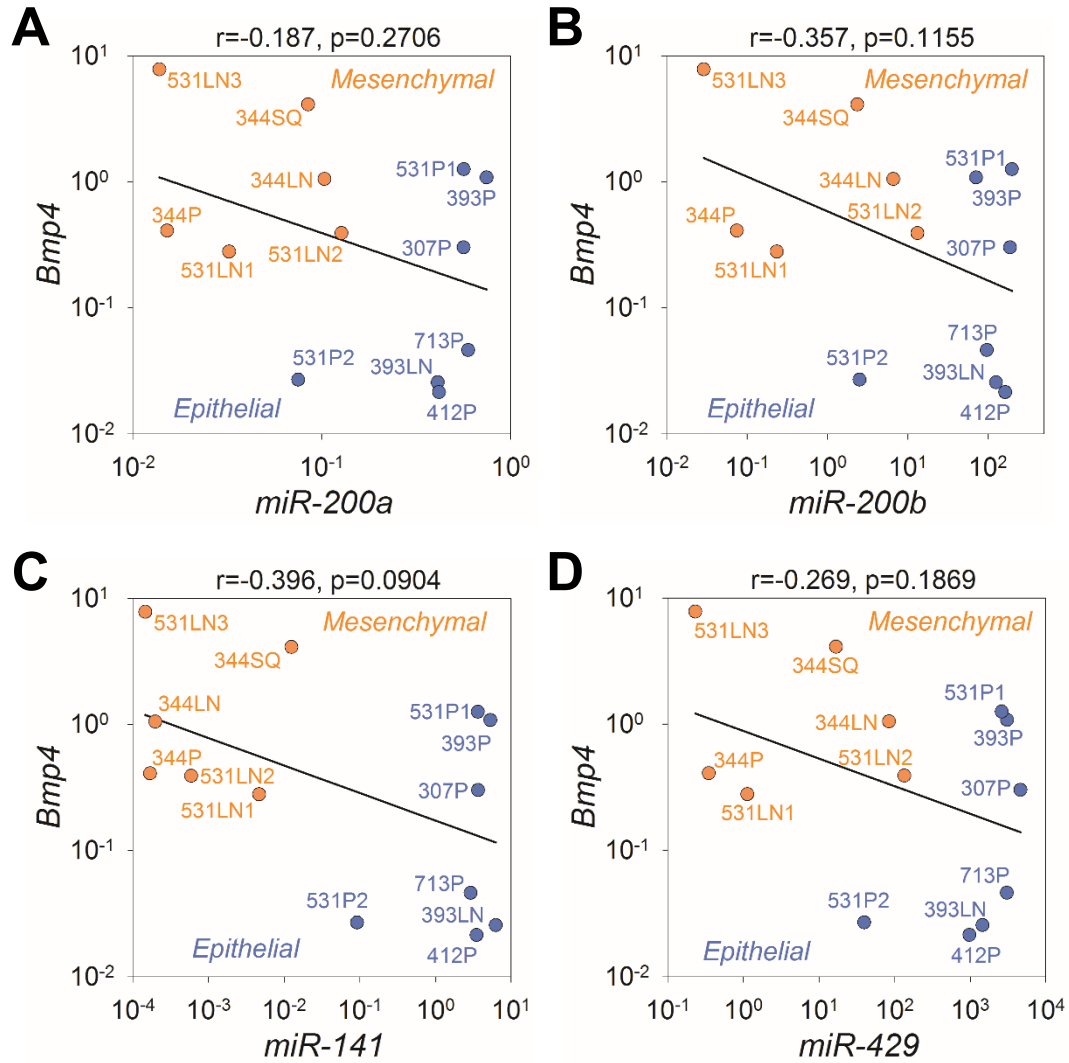

Figure S1

## Human lung adenocarcinomas (n=32)

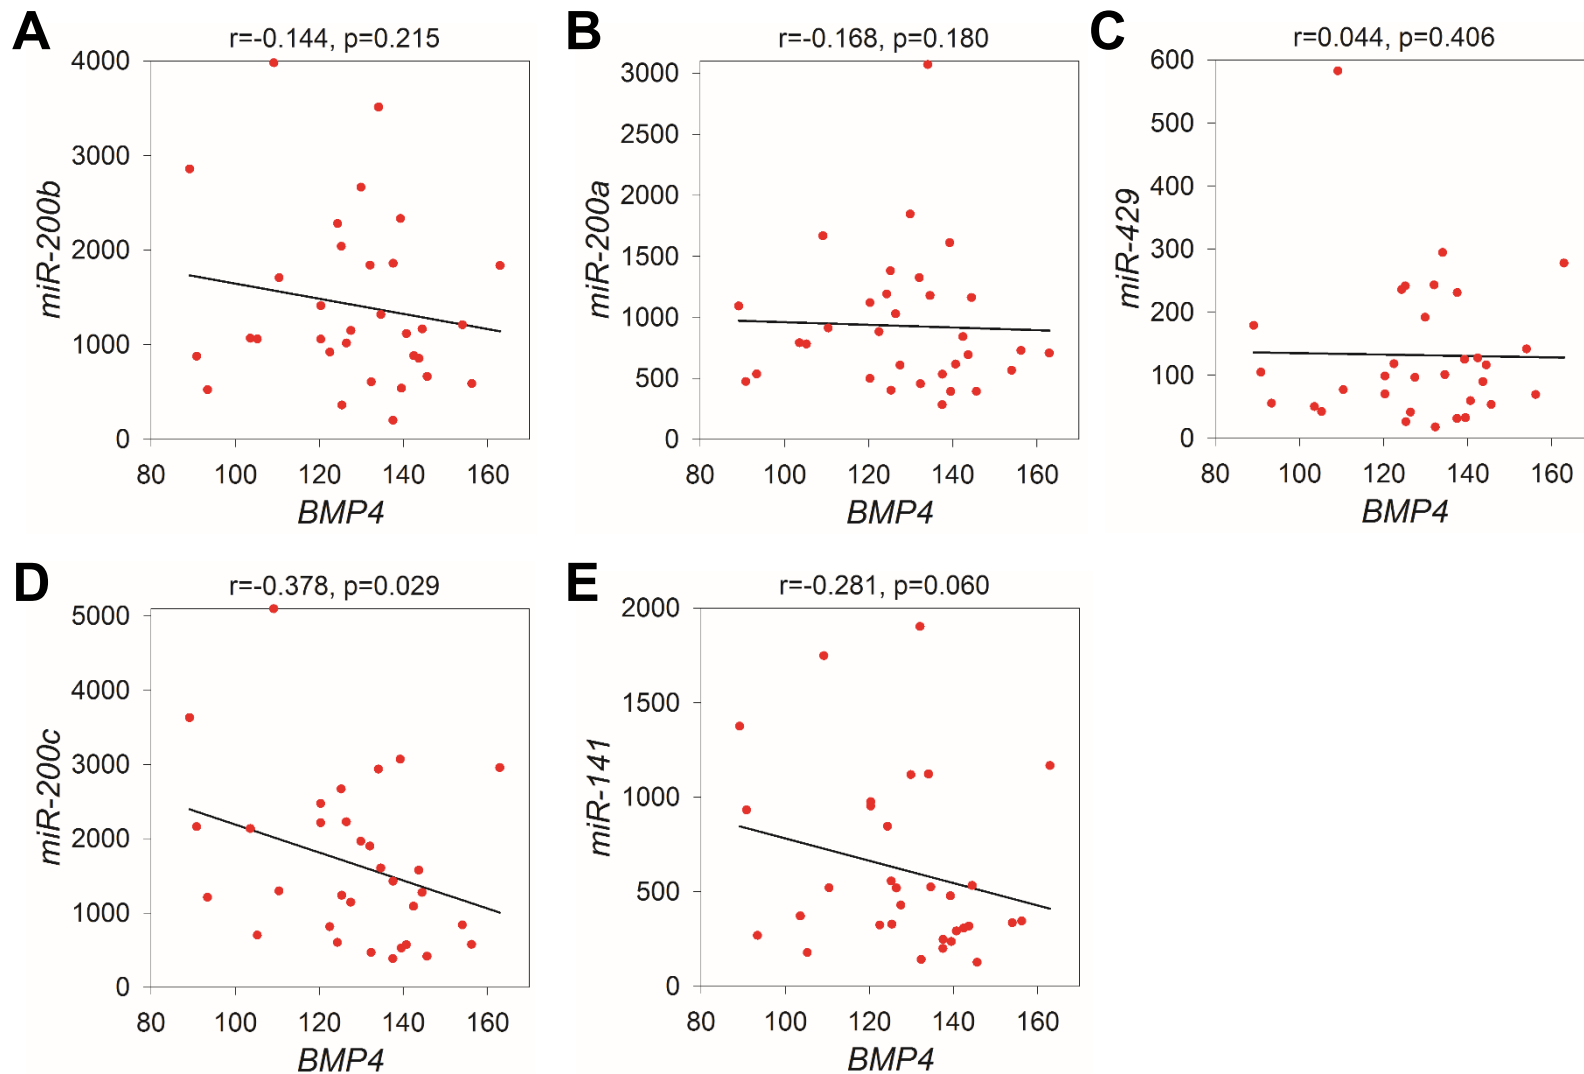

**Figure S2**

Human breast invasive carcinomas (n=285)

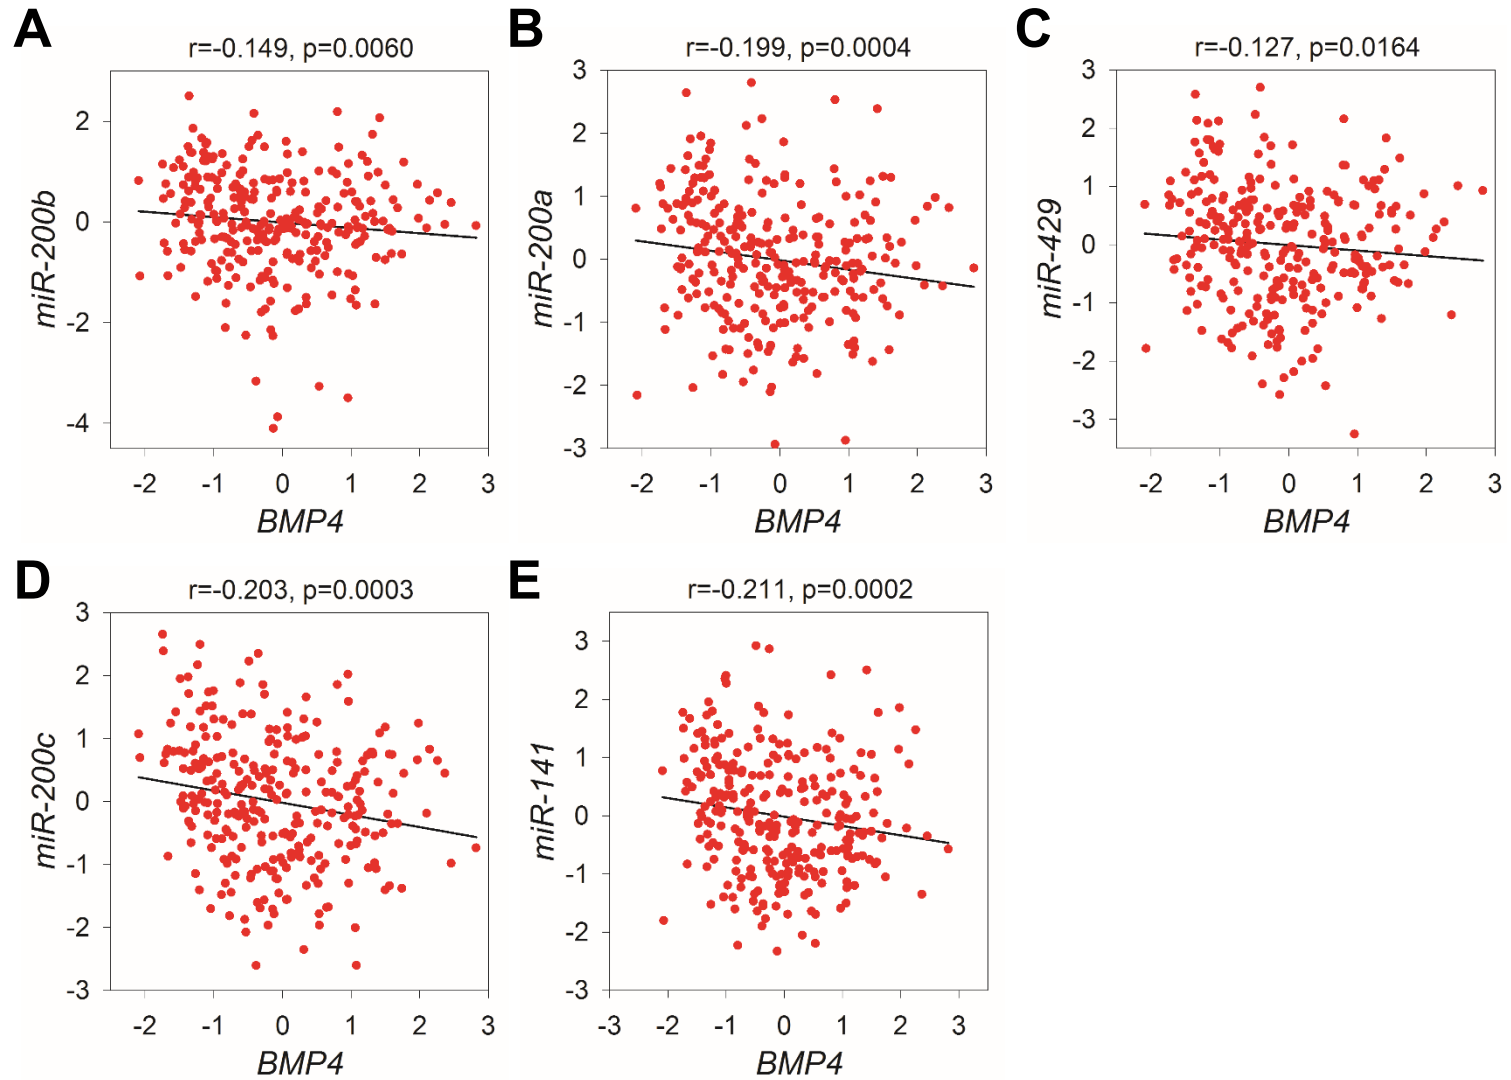

Figure S3

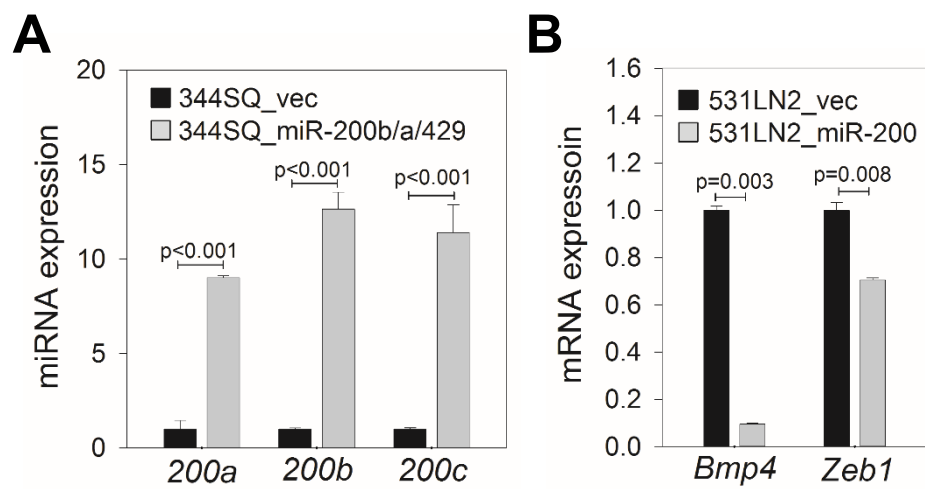

**Figure S4**

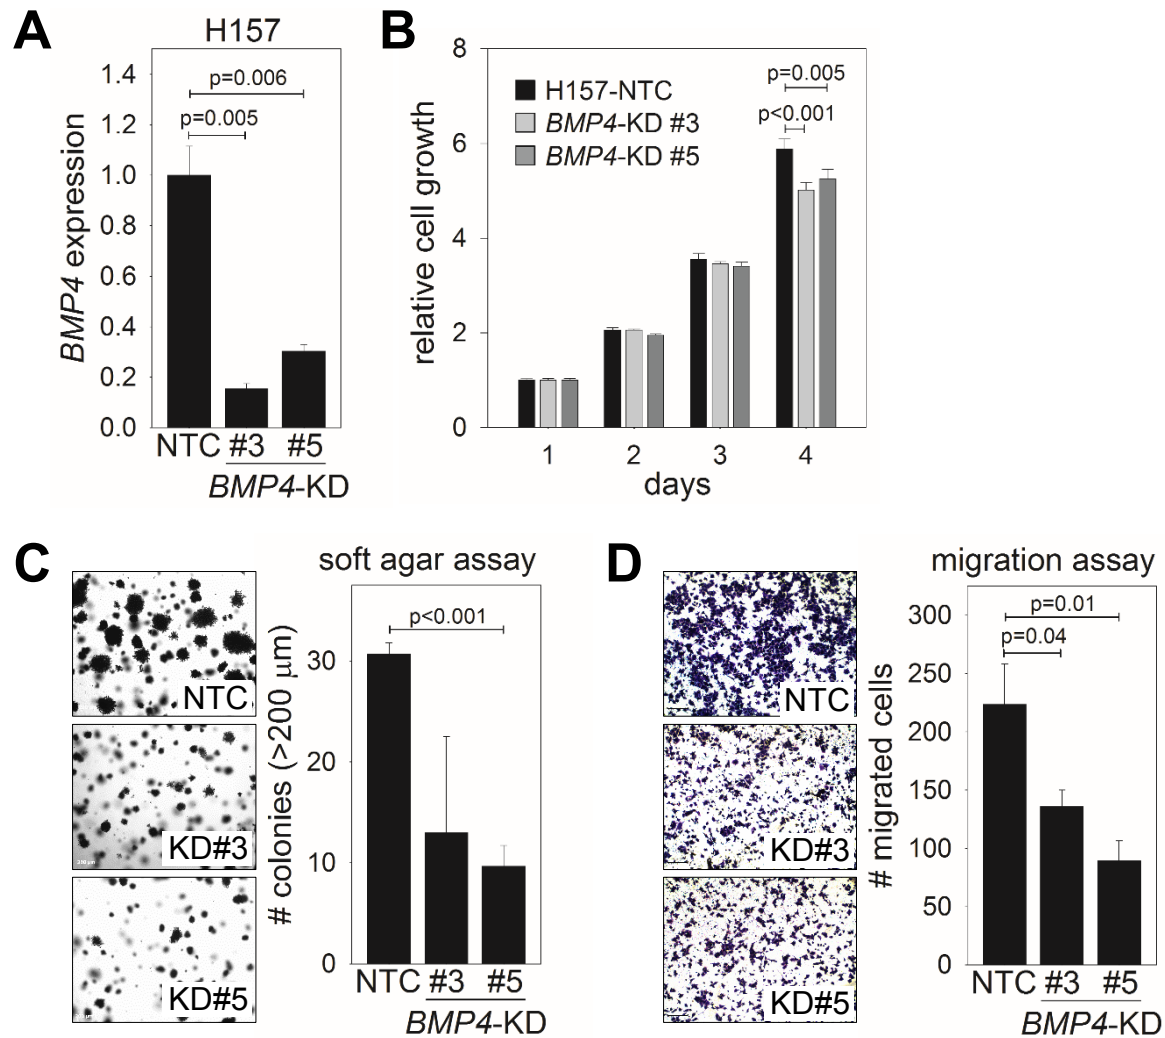

**Figure S5**
